# Supplementary material for: Burden and Treatment of Achondroplasia: A Systematic Literature Review
Source: Springer Nature journal article supplement (doi:10.1007/s12325-023-02549-3), 2023-06-29
Supplement: MOESM1 [file 25552662]

# **Burden and Treatment of Achondroplasia: A Systematic Literature Review**

## **Supplementary Appendices**

Molly C Murton<sup>1</sup>, Emma L A Drane<sup>2</sup>, Danielle M Goff-Leggett<sup>2</sup>, Renée Shediak<sup>3</sup>, Jamie O'Hara<sup>4</sup>, Melita Irving<sup>5</sup>, Thomas J Butt<sup>6</sup>

1. Costello Medical Consulting Ltd, London, UK
2. Costello Medical Consulting Ltd, Cambridge, UK
3. BioMarin Pharmaceutical Inc, Novato, California, US
4. HCD Economics Ltd, Daresbury, UK
5. Guy's and St Thomas' NHS Foundation Trust, London, UK
6. BioMarin Europe Ltd, London, UK

**Correspondence to:** Thomas Butt: [tom.butt@bmrn.com](mailto:tom.butt@bmrn.com)

## Contents

|                                                                                                                                                                                              |          |
|----------------------------------------------------------------------------------------------------------------------------------------------------------------------------------------------|----------|
| <b>SUPPLEMENTARY APPENDIX 1</b> .....                                                                                                                                                        | <b>3</b> |
| <b>SUPPLEMENTARY APPENDIX 2</b> .....                                                                                                                                                        | <b>6</b> |
| Supplementary Table 1. Inclusion criteria for the SLR .....                                                                                                                                  | 3        |
| Supplementary Table 2. Clinical efficacy and safety search terms for MEDLINE, MEDLINE In-Process, MEDLINE Daily and MEDLINE Epub Ahead of Print (via Ovid) .....                             | 6        |
| Supplementary Table 3. Economic evaluation, HRQoL/utility and cost/resource use search terms for MEDLINE, MEDLINE In-Process, MEDLINE Daily and MEDLINE Epub Ahead of Print (via Ovid) ..... | 7        |
| Supplementary Table 4. Clinical efficacy and safety search terms for Embase (via Ovid).....                                                                                                  | 9        |
| Supplementary Table 5. Economic evaluation, HRQoL/utility and cost/resource use search terms for Embase (via Ovid) .....                                                                     | 11       |
| Supplementary Table 6. Search terms for Cochrane Library databases: CDSR and CENTRAL (via Wiley) .                                                                                           | 13       |
| Supplementary Table 7. Search terms for DARE (via the University of York CRD platform) .....                                                                                                 | 13       |
| Supplementary Table 8. Search terms for the NHS-EED and HTAD (via the University of York CRD platform) .....                                                                                 | 13       |
| Supplementary Table 9. Search terms for the HTAD (via the INAHTA platform) .....                                                                                                             | 14       |
| Supplementary Table 10. Search terms for non-English databases and clinical trial registries .....                                                                                           | 14       |
| Supplementary Table 11. Search strategies for hand-searching of relevant congresses .....                                                                                                    | 15       |
| Supplementary Table 12. Search strategies for hand-searching of HTA body and economic websites .....                                                                                         | 17       |
| Supplementary Table 13. Search terms for clinical guideline repositories .....                                                                                                               | 21       |

**SUPPLEMENTARY APPENDIX 1**

Eligibility Criteria

**Supplementary Table 1. Inclusion criteria for the SLR**

Burden and Treatment of Achondroplasia SLR – Supplementary Appendices

| Category                        | Economic evaluations                                                                                                                                                                                                                                                                                                                                                                                                                                                                                                                                                                                          | Patient and caregiver HRQoL                                                                                                                                                                                                                                                                                                                                  | Cost and resource use                                                                                                                                                                                                                                                                                                                                                                                                                                                                                                                                                           | Clinical efficacy and safety                                                                                                                                                                                                                                                                                                                                                                                                                                                                                                                                                                                                                                          |
|---------------------------------|---------------------------------------------------------------------------------------------------------------------------------------------------------------------------------------------------------------------------------------------------------------------------------------------------------------------------------------------------------------------------------------------------------------------------------------------------------------------------------------------------------------------------------------------------------------------------------------------------------------|--------------------------------------------------------------------------------------------------------------------------------------------------------------------------------------------------------------------------------------------------------------------------------------------------------------------------------------------------------------|---------------------------------------------------------------------------------------------------------------------------------------------------------------------------------------------------------------------------------------------------------------------------------------------------------------------------------------------------------------------------------------------------------------------------------------------------------------------------------------------------------------------------------------------------------------------------------|-----------------------------------------------------------------------------------------------------------------------------------------------------------------------------------------------------------------------------------------------------------------------------------------------------------------------------------------------------------------------------------------------------------------------------------------------------------------------------------------------------------------------------------------------------------------------------------------------------------------------------------------------------------------------|
| <b>Population</b>               | <ul style="list-style-type: none"> <li>Paediatric or adult patients with achondroplasia or any other form of short stature*, or their caregivers**</li> </ul> <p><i>* For patient/caregiver HRQoL, data specifically for achondroplasia were subsequently prioritised over other short stature conditions in a deviation from the protocol</i><br/> <i>** Caregiver quality of life was included from the point of the SLR update onwards, however, records identified in the original SLR searches were re-reviewed in order to ensure all relevant data on caregiver quality of life were captured.</i></p> |                                                                                                                                                                                                                                                                                                                                                              |                                                                                                                                                                                                                                                                                                                                                                                                                                                                                                                                                                                 | <ul style="list-style-type: none"> <li>Paediatric patients (aged &lt;18 years) with achondroplasia</li> <li>Patients with active or "open" growth plates</li> <li>Mixed populations if results for paediatric patients with achondroplasia were reported separately</li> </ul>                                                                                                                                                                                                                                                                                                                                                                                        |
| <b>Intervention/comparators</b> | <ul style="list-style-type: none"> <li>Any or none</li> </ul>                                                                                                                                                                                                                                                                                                                                                                                                                                                                                                                                                 |                                                                                                                                                                                                                                                                                                                                                              |                                                                                                                                                                                                                                                                                                                                                                                                                                                                                                                                                                                 | <ul style="list-style-type: none"> <li>CNP analogues</li> <li>Growth hormone therapies</li> <li>FGFR3 inhibitors</li> <li>SoC or placebo</li> <li>Surgical limb lengthening</li> </ul>                                                                                                                                                                                                                                                                                                                                                                                                                                                                                |
| <b>Outcomes</b>                 | <ul style="list-style-type: none"> <li>ICERs</li> <li>Cost per clinical outcome</li> <li>Total QALYs</li> <li>Total DALYs</li> <li>Total LYGs</li> <li>Total costs</li> <li>Incremental costs and QALYs/DALYs</li> </ul>                                                                                                                                                                                                                                                                                                                                                                                      | <p>Any QoL data related to treatment options and their adverse events, if measured by a formal validated tool or instrument, including but not limited to:</p> <ul style="list-style-type: none"> <li>SF-36</li> <li>PedsQL</li> <li>QoLISSY</li> <li>WeeFIM</li> <li>EQ-5D</li> <li>Standard gamble</li> <li>Time trade-off</li> </ul> <p>Caregiver QoL</p> | <p>Both direct and indirect cost/resource use:</p> <p><b>Direct costs</b>, including:</p> <ul style="list-style-type: none"> <li>Drug cost</li> <li>Administration cost</li> <li>Hospitalisation cost</li> </ul> <p><b>Indirect costs</b>, including:</p> <ul style="list-style-type: none"> <li>Productivity loss</li> <li>Home adaptation</li> <li>Travel costs</li> </ul> <p><b>Resource use</b>, including:</p> <ul style="list-style-type: none"> <li>Surgery</li> <li>Imaging (e.g. MRI/x-ray)</li> <li>GP/hospital consultations</li> <li>Blood/insulin tests</li> </ul> | <p>Efficacy outcomes, including:</p> <ul style="list-style-type: none"> <li>Change in height</li> <li>Growth velocity</li> <li>Upper:lower body segment ratio, or other body proportion ratios</li> <li>Height Z scores</li> <li>MRI imaging</li> <li>FAH</li> <li>Bone age</li> <li>Bone mineral density</li> <li>IGF-1 levels</li> </ul> <p>Safety outcomes, including but not limited to:</p> <ul style="list-style-type: none"> <li>AEs</li> <li>Treatment-related AEs</li> <li>Serious AEs</li> <li>Deaths</li> <li>Discontinuation due to AEs</li> <li>Discontinuation due to treatment-related AEs</li> <li>Bone morphology/quality-related changes</li> </ul> |

Burden and Treatment of Achondroplasia SLR – Supplementary Appendices

| Category                    | Economic evaluations                                                                                                                                                                                                 | Patient and caregiver HRQoL | Cost and resource use | Clinical efficacy and safety                                                                                                                                                                                             |
|-----------------------------|----------------------------------------------------------------------------------------------------------------------------------------------------------------------------------------------------------------------|-----------------------------|-----------------------|--------------------------------------------------------------------------------------------------------------------------------------------------------------------------------------------------------------------------|
| <b>Study design</b>         | Any of the following analysis types: <ul style="list-style-type: none"> <li>• Cost-utility</li> <li>• Cost-effectiveness</li> <li>• Cost-consequence</li> <li>• Cost-benefit</li> <li>• Cost-minimisation</li> </ul> | Any original research study |                       | <ul style="list-style-type: none"> <li>• Any RCTs</li> <li>• Interventional non-RCTs, such as controlled (but not randomised) clinical trials and single arm clinical trials</li> <li>• Observational studies</li> </ul> |
| <b>Other considerations</b> | <ul style="list-style-type: none"> <li>• Original research studies</li> <li>• Congress abstracts published in or after 2018</li> <li>• Human subjects</li> <li>• Any language</li> <li>• Any country</li> </ul>      |                             |                       |                                                                                                                                                                                                                          |

**Abbreviations:** AE, adverse event; CNP, C-type natriuretic peptide; DALY, Disability-adjusted life year; EQ-5D, EuroQol five dimensions five levels; FAH, final adult height; FGFR3, fibroblast growth factor receptor 3 gene; GP, general practitioner; HRQoL, health-related quality of life; HTA, health technology assessment; ICER, incremental cost-effectiveness ratio; IGF-1, insulin-like growth factor-1; LYG, life years gained; MRI, magnetic resonance imaging; NA, not applicable; PedsQL, Pediatric Quality of Life Inventory; QALY, quality-adjusted life-year; QoL, quality of life; QoLISSY, Quality of Life of Short Stature Youth; RCT, randomised clinical trial; SF-36, 36-Item Short Form Survey; SLR, systematic literature review; SoC, standard of care; WeeFIM, Pediatric Functional Independence Measure.

**SUPPLEMENTARY APPENDIX 2**Electronic Database Search Terms**Supplementary Table 2. Clinical efficacy and safety search terms for MEDLINE, MEDLINE In-Process, MEDLINE Daily and MEDLINE Epub Ahead of Print (via Ovid)**

| Group                 | #                                              | Searches                                                                                 | Results (11.09.20)         | Results (10.06.21) |         |
|-----------------------|------------------------------------------------|------------------------------------------------------------------------------------------|----------------------------|--------------------|---------|
| <b>Achondroplasia</b> | 1                                              | exp achondroplasia/                                                                      | 2292                       | 2339               |         |
|                       | 2                                              | (achondroplas\$ or FGFR3\$ or FGFR-3\$ or Fibroblast Growth Factor Receptor 3).ti,ab,kf. | 4267                       | 4479               |         |
|                       | 3                                              | 1 or 2                                                                                   | 5100                       | 5320               |         |
| <b>RCTs</b>           | 4                                              | randomized controlled trials as topic/                                                   | 135997                     | 144602             |         |
|                       | 5                                              | randomized controlled trial/                                                             | 512759                     | 533070             |         |
|                       | 6                                              | random allocation/                                                                       | 103565                     | 105440             |         |
|                       | 7                                              | double blind method/                                                                     | 159695                     | 164865             |         |
|                       | 8                                              | single blind method/                                                                     | 28994                      | 30314              |         |
|                       | 9                                              | clinical trial/                                                                          | 524656                     | 529237             |         |
|                       | 10                                             | clinical trial, phase i.pt.                                                              | 20761                      | 21716              |         |
|                       | 11                                             | clinical trial, phase ii.pt.                                                             | 33381                      | 34984              |         |
|                       | 12                                             | clinical trial, phase iii.pt.                                                            | 17197                      | 18502              |         |
|                       | 13                                             | clinical trial, phase iv.pt.                                                             | 1947                       | 2112               |         |
|                       | 14                                             | controlled clinical trial.pt.                                                            | 93834                      | 94201              |         |
|                       | 15                                             | randomized controlled trial.pt.                                                          | 512759                     | 533070             |         |
|                       | 16                                             | multicenter study.pt.                                                                    | 278747                     | 295979             |         |
|                       | 17                                             | clinical trial.pt.                                                                       | 524656                     | 529237             |         |
|                       | 18                                             | exp clinical trials as topic/                                                            | 345552                     | 358461             |         |
|                       | 19                                             | controlled clinical trial/                                                               | 93834                      | 94201              |         |
|                       | 20                                             | multicenter study/                                                                       | 278747                     | 295979             |         |
|                       | 21                                             | (clinical adj trial\$).ti,ab,kf.                                                         | 381905                     | 410496             |         |
|                       | 22                                             | ((singl\$ or doubl\$ or treb\$ or tripl\$) adj (blind\$3 or mask\$3)).ti,ab,kf.          | 174360                     | 180756             |         |
|                       | 23                                             | placebos/                                                                                | 35071                      | 35518              |         |
|                       | 24                                             | placebo\$.ti,ab,kf.                                                                      | 218533                     | 226678             |         |
|                       | 25                                             | (allocat\$ adj2 random\$).ti,ab,kf.                                                      | 35525                      | 37796              |         |
|                       | 26                                             | Randomi?ed adj2 trial\$.ti,ab,kf.                                                        | 327471                     | 354421             |         |
|                       | 27                                             | rct.ti,ab,kf.                                                                            | 23704                      | 26307              |         |
|                       | 28                                             | or/4-27                                                                                  | 1743054                    | 1824665            |         |
|                       | <b>Non-RCTs/<br/>observational<br/>studies</b> | 29                                                                                       | exp Epidemiologic studies/ | 2530938            | 2688798 |
|                       |                                                | 30                                                                                       | exp Case Control studies/  | 1101734            | 1181597 |
|                       |                                                | 31                                                                                       | exp Cohort Studies/        | 2028376            | 2148359 |
| 32                    |                                                | Case control.ti,ab,kf.                                                                   | 128055                     | 135392             |         |
| 33                    |                                                | (cohort adj (study or studies)).ti,ab,kf.                                                | 215089                     | 241484             |         |
| 34                    |                                                | cohort analy\$.ti,ab,kf.                                                                 | 9018                       | 9942               |         |
| 35                    |                                                | (follow up adj (study or studies)).ti,ab,kf.                                             | 51201                      | 52972              |         |
| 36                    |                                                | (observational adj (study or studies)).ti,ab,kf.                                         | 110703                     | 124088             |         |
| 37                    |                                                | Longitudinal\$.ti,ab,kf.                                                                 | 268941                     | 289124             |         |
| 38                    |                                                | retrospective\$.ti,ab,kf.                                                                | 757585                     | 828215             |         |
| 39                    |                                                | Cross sectional.ti,ab,kf.                                                                | 362274                     | 400362             |         |
| 40                    |                                                | Cross-sectional studies/                                                                 | 336408                     | 369992             |         |
| 41                    |                                                | exp Longitudinal Studies/                                                                | 137289                     | 146130             |         |

## Burden and Treatment of Achondroplasia SLR – Supplementary Appendices

| Group           | #                      | Searches                                                        | Results<br>(11.09.20)        | Results<br>(10.06.21) |
|-----------------|------------------------|-----------------------------------------------------------------|------------------------------|-----------------------|
|                 | 42                     | exp Follow-Up Studies/                                          | 646691                       | 663944                |
|                 | 43                     | exp Prospective Studies/                                        | 547767                       | 578536                |
|                 | 44                     | exp Retrospective Studies/                                      | 837290                       | 904830                |
|                 | 45                     | (Prospective adj (study or studies)).ti,ab,kf.                  | 177332                       | 185958                |
|                 | 46                     | (evaluation adj (study or studies)).ti,ab,kf.                   | 5894                         | 6335                  |
|                 | 47                     | (epidemiologic adj (study or studies)).ti,ab,kf.                | 26833                        | 27498                 |
|                 | 48                     | (( or Single arm) adj3 (study or studies or trial\$)).ti,ab,kf. | 5585                         | 6463                  |
|                 | 49                     | (Open-label adj (trial\$ or stud\$)).ti,ab,kf.                  | 11432                        | 12015                 |
|                 | 50                     | Non-blinded stud\$.ti,ab,kf.                                    | 132                          | 132                   |
|                 | 51                     | (chart adj3 review).ti,ab,kf.                                   | 40514                        | 43478                 |
|                 | 52                     | or/29-51                                                        | 3231774                      | 3442969               |
|                 | <b>Exclusion terms</b> | 53                                                              | exp animals/ not exp humans/ | 4732434               |
| 54              |                        | (comment or editorial).pt.                                      | 1239544                      | 1304305               |
| 55              |                        | historical article/                                             | 360019                       | 363956                |
| 56              |                        | or/53-55                                                        | 6261662                      | 6435645               |
| <b>Combined</b> | 57                     | 3 and (28 or 52)                                                | 757                          | 823                   |
|                 | 58                     | 57 not 56                                                       | 736                          | 799                   |
|                 | 59                     | Remove duplicates from 58                                       | <b>733</b>                   | <b>797</b>            |

**Database:** Ovid MEDLINE(R) and Epub Ahead of Print, In-Process & Other Non-Indexed Citations and Daily 1946 to September 09, 2020 (original SLR) and June 09, 2021 (SLR update).

### Supplementary Table 3. Economic evaluation, HRQoL/utility and cost/resource

use search terms for MEDLINE, MEDLINE In-Process, MEDLINE Daily and

MEDLINE Epub Ahead of Print (via Ovid)

| Group                | #  | Searches                                                                                                                                                                                                                       | Results<br>(27.08.20) | Results<br>(10.06.21) |
|----------------------|----|--------------------------------------------------------------------------------------------------------------------------------------------------------------------------------------------------------------------------------|-----------------------|-----------------------|
| Achondroplasia       | 1  | exp achondroplasia/ or exp dwarfism/                                                                                                                                                                                           | 16150                 | 16458                 |
|                      | 2  | (achondroplas\$ or FGFR3\$ or FGFR-3\$ or Fibroblast Growth Factor Receptor 3 or dwarfism*).ti,ab,kf.                                                                                                                          | 9033                  | 9393                  |
|                      | 3  | 1 or 2                                                                                                                                                                                                                         | 20716                 | 21303                 |
| Economic Evaluations | 4  | Cost-benefit analysis/                                                                                                                                                                                                         | 81537                 | 84855                 |
|                      | 5  | "Costs and cost analysis"/                                                                                                                                                                                                     | 48792                 | 49626                 |
|                      | 6  | Economics/                                                                                                                                                                                                                     | 27220                 | 27335                 |
|                      | 7  | (cost\$ adj (effective\$ or utilit\$ or consequence\$ or benefit\$ or minimi\$)).ti,ab,kf.                                                                                                                                     | 149951                | 160344                |
|                      | 8  | (economic evaluation\$ or economic analysis or life year\$ gained or ICER or QALY\$ or DALY\$ or quality adjusted or adjusted life year\$ or disability adjusted life or qald\$ or qale\$ or qtime\$).ti,ab,kf.                | 35113                 | 38024                 |
|                      | 9  | Quality-adjusted life years/                                                                                                                                                                                                   | 12378                 | 13336                 |
|                      | 10 | Value of life/                                                                                                                                                                                                                 | 5711                  | 5749                  |
|                      | 11 | or/4-10                                                                                                                                                                                                                        | 272881                | 286015                |
|                      | 12 | (health utilit\$ or health state\$1 or illness state\$1 or HSUV or HSUVs or health state\$ value\$ or health state\$ preference\$ or utility assessment\$ or utility measure\$ or preference based or utility based).ti,ab,kf. | 9794                  | 10545                 |
|                      | 13 | ((index adj3 wellbeing) or (quality adj3 wellbeing) or qwb).ti,ab,kf.                                                                                                                                                          | 767                   | 850                   |

Burden and Treatment of Achondroplasia SLR – Supplementary Appendices

| Group                            | #  | Searches                                                                                                                                                                                                                                                                                                                                                                                        | Results<br>(27.08.20) | Results<br>(10.06.21) |
|----------------------------------|----|-------------------------------------------------------------------------------------------------------------------------------------------------------------------------------------------------------------------------------------------------------------------------------------------------------------------------------------------------------------------------------------------------|-----------------------|-----------------------|
|                                  | 14 | (multiattribute\$ or multi attribute\$).ti,ab.                                                                                                                                                                                                                                                                                                                                                  | 886                   | 971                   |
|                                  | 15 | utility.ab. /freq=2                                                                                                                                                                                                                                                                                                                                                                             | 17804                 | 19303                 |
|                                  | 16 | (utilities or disutilit\$).ti,ab,kf.                                                                                                                                                                                                                                                                                                                                                            | 7575                  | 8139                  |
|                                  | 17 | (euro qual or euro qual5d or euro qol5d or eq-5d or eq5-d or eq5d or eq 5d or euroqual or euroqol or euro qol or euroqual5d or euroqol5d or eq-sdq or eqsdq).ti,ab,kf.                                                                                                                                                                                                                          | 11403                 | 12787                 |
|                                  | 18 | (short form\$ or shortform\$).ti,ab.                                                                                                                                                                                                                                                                                                                                                            | 33930                 | 36610                 |
|                                  | 19 | (sf36\$ or sf 36\$ or sf thirtysix or sf thirty six).ti,ab,kf.                                                                                                                                                                                                                                                                                                                                  | 22380                 | 23546                 |
|                                  | 20 | (sf6 or sf 6 or sf6d or sf 6d or sf six D or sfsixD or sf six or sfsix or sf8 or sf 8 or sf eight or sfeight).ti,ab,kf.                                                                                                                                                                                                                                                                         | 3328                  | 3496                  |
|                                  | 21 | (sf12 or sf 12 or sf twelve or sftwelve).ti,ab,kf.                                                                                                                                                                                                                                                                                                                                              | 4836                  | 5250                  |
|                                  | 22 | (sf16 or sf 16 or sf sixteen or sfsixteen).ti,ab,kf.                                                                                                                                                                                                                                                                                                                                            | 30                    | 30                    |
|                                  | 23 | (sf20 or sf 20 or sf twenty or sftwenty).ti,ab,kf.                                                                                                                                                                                                                                                                                                                                              | 337                   | 343                   |
|                                  | 24 | (15D or 15-D or 15 dimension).ti,ab,kf.                                                                                                                                                                                                                                                                                                                                                         | 5302                  | 5577                  |
|                                  | 25 | visual analog\$ scale\$.ti,ab,kf.                                                                                                                                                                                                                                                                                                                                                               | 56168                 | 60883                 |
|                                  | 26 | (standard gamble\$ or sg).ti,ab,kf.                                                                                                                                                                                                                                                                                                                                                             | 10931                 | 11820                 |
|                                  | 27 | (time trade off\$1 or time tradeoff\$1 or tto or timetradeoff\$1).ti,ab,kf.                                                                                                                                                                                                                                                                                                                     | 1928                  | 2032                  |
|                                  | 28 | (health\$1 year\$1 equivalent\$1 or hye or hyes).ti,ab,kf.                                                                                                                                                                                                                                                                                                                                      | 78                    | 83                    |
|                                  | 29 | (hui or hui1 or hui2 or hui3 or rosser).ti,ab,kf.                                                                                                                                                                                                                                                                                                                                               | 1643                  | 1759                  |
|                                  | 30 | *quality of life/ and (quality of life or qol or hrqol).ti,ab,kf.                                                                                                                                                                                                                                                                                                                               | 73519                 | 79795                 |
|                                  | 31 | quality of life/ and ((quality of life or qol) adj3 (improv\$ or chang\$)).ti,ab,kf.                                                                                                                                                                                                                                                                                                            | 27745                 | 30653                 |
|                                  | 32 | quality of life/ and ((quality of life or qol or hrqol) adj (score\$1 or measure\$1)).ti,ab,kf.                                                                                                                                                                                                                                                                                                 | 13952                 | 15007                 |
|                                  | 33 | quality of life/ and health-related quality of life.ti,ab,kf.                                                                                                                                                                                                                                                                                                                                   | 32330                 | 35434                 |
|                                  | 34 | quality of life/ and ec.fs.                                                                                                                                                                                                                                                                                                                                                                     | 10119                 | 10572                 |
|                                  | 35 | quality of life/ and (health adj3 status).ti,ab,kf.                                                                                                                                                                                                                                                                                                                                             | 9071                  | 9731                  |
|                                  | 36 | ((qol or hrqol or quality of life).ti,kf. or *quality of life/) and ((qol or hrqol\$ or quality of life) adj2 (increas\$ or decrease\$ or improv\$ or declin\$ or reduc\$ or high\$ or low\$ or effect or effects or worse or score or scores or change\$1 or impact\$1 or impacted or deteriorat\$)).ab.                                                                                       | 38348                 | 42283                 |
|                                  | 37 | (brief pain inventory or BPI\$ or patient health questionnaire\$ or PHQ\$ or (generalized anxiety disorder\$ adj2 questionnaire) or GAD\$ or PedsQL or Peds-QL or Pediatric Quality of Life Inventory or Quality of Life of Short Stature Youth or QoLISSY or adolescent pediatric pain tool or adolescent paediatric pain tool or APPT or weefim or functional independence measure).ti,ab,kf. | 63326                 | 68022                 |
|                                  | 38 | or/12-37                                                                                                                                                                                                                                                                                                                                                                                        | 300104                | 324832                |
| Healthcare Cost and Resource Use | 39 | Cost allocation/                                                                                                                                                                                                                                                                                                                                                                                | 2004                  | 2008                  |
|                                  | 40 | Cost control/                                                                                                                                                                                                                                                                                                                                                                                   | 21509                 | 21585                 |
|                                  | 41 | Cost savings/                                                                                                                                                                                                                                                                                                                                                                                   | 11882                 | 12226                 |
|                                  | 42 | Cost of illness/                                                                                                                                                                                                                                                                                                                                                                                | 27401                 | 28910                 |



## Burden and Treatment of Achondroplasia SLR – Supplementary Appendices

| Group           | #  | Searches                                                                                                                                                            | Results<br>(27.08.20) | Results<br>(10.06.21) |
|-----------------|----|---------------------------------------------------------------------------------------------------------------------------------------------------------------------|-----------------------|-----------------------|
|                 | 43 | Cost sharing/                                                                                                                                                       | 2535                  | 2609                  |
|                 | 44 | "Deductibles and coinsurance"/                                                                                                                                      | 1754                  | 1783                  |
|                 | 45 | Medical savings accounts/                                                                                                                                           | 536                   | 542                   |
|                 | 46 | Health care costs/                                                                                                                                                  | 39780                 | 41418                 |
|                 | 47 | Direct service costs/                                                                                                                                               | 1191                  | 1204                  |
|                 | 48 | Drug costs/                                                                                                                                                         | 16151                 | 16618                 |
|                 | 49 | Employer health costs/                                                                                                                                              | 1092                  | 1094                  |
|                 | 50 | Hospital costs/                                                                                                                                                     | 11115                 | 11497                 |
|                 | 51 | Health expenditures/                                                                                                                                                | 20379                 | 21457                 |
|                 | 52 | Capital expenditures/                                                                                                                                               | 1990                  | 1997                  |
|                 | 53 | exp economics, Hospital/                                                                                                                                            | 24627                 | 25137                 |
|                 | 54 | exp economics, Medical/                                                                                                                                             | 14214                 | 14262                 |
|                 | 55 | Economics, nursing/                                                                                                                                                 | 3999                  | 4004                  |
|                 | 56 | Economics, pharmaceutical/                                                                                                                                          | 2950                  | 2994                  |
|                 | 57 | exp Budgets/                                                                                                                                                        | 13733                 | 13832                 |
|                 | 58 | Financial management/                                                                                                                                               | 16565                 | 16686                 |
|                 | 59 | exp "Fees and charges"/                                                                                                                                             | 30366                 | 30732                 |
|                 | 60 | (low adj cost).mp.                                                                                                                                                  | 59665                 | 66237                 |
|                 | 61 | (high adj cost).mp.                                                                                                                                                 | 14889                 | 16092                 |
|                 | 62 | (health?care adj cost\$).mp.                                                                                                                                        | 11888                 | 13163                 |
|                 | 63 | (fiscal or funding or financial or finance).ti,ab,kf.                                                                                                               | 151063                | 163542                |
|                 | 64 | (cost adj estimate\$).mp.                                                                                                                                           | 2308                  | 2428                  |
|                 | 65 | (cost adj variable\$).mp.                                                                                                                                           | 165                   | 172                   |
|                 | 66 | (unit adj cost\$).mp.                                                                                                                                               | 2544                  | 2709                  |
|                 | 67 | (economic\$ or pharmacoeconomic\$ or price\$ or pricing).ti,ab,kf.                                                                                                  | 326903                | 354043                |
|                 | 68 | ((resource\$ or healthcare\$ or service\$) adj3 (use\$ or utilis\$ or utiliz\$ or consume\$ or consuming or consumption\$)).ti,ab,kf.                               | 105427                | 114689                |
|                 | 69 | ((patient\$ or caregiver\$ or carer\$ or social\$ or society\$ or family\$ or work\$) adj2 (burden\$ or productiv\$)).ti,ab,kf.                                     | 19989                 | 22307                 |
|                 | 70 | ("length of stay" or utili?ation or "economic burden" or "cost-of-illness" or nursing cost\$ or physician cost\$ or physician visit\$ or "out of pocket").ti,ab,kf. | 278374                | 300997                |
|                 | 71 | (absenteeism or presenteeism or employment or unemployment).ti,ab,kf. or exp presenteeism/ or exp absenteeism/ or exp unemployment/ or exp employment/              | 143016                | 150515                |
|                 | 72 | or/39-71                                                                                                                                                            | 1083883               | 1161986               |
| Exclusion Terms | 73 | exp animals/ not exp humans/                                                                                                                                        | 4728766               | 4839817               |
|                 | 74 | (comment or editorial).pt.                                                                                                                                          | 1236733               | 1304305               |
|                 | 75 | historical article/                                                                                                                                                 | 359840                | 363956                |
|                 | 76 | or/73-75                                                                                                                                                            | 6255066               | 6435645               |
| Combination     | 77 | 3 and (11 or 38 or 72)                                                                                                                                              | 388                   | 406                   |
|                 | 78 | 77 not 76                                                                                                                                                           | 343                   | 359                   |
|                 | 79 | remove duplicates from 78                                                                                                                                           | <b>342</b>            | <b>359</b>            |

**Database:** Ovid MEDLINE(R) and Epub Ahead of Print, In-Process & Other Non-Indexed Citations and Daily 1946 to August 26, 2020 (original SLR) and June 09, 2021 (SLR update).

### Supplementary Table 4. Clinical efficacy and safety search terms for Embase

(via Ovid)

| Group                 | # | Searches            | Results<br>(11.09.20) | Results<br>(10.06.21) |
|-----------------------|---|---------------------|-----------------------|-----------------------|
| <b>Achondroplasia</b> | 1 | exp achondroplasia/ | 2894                  | 2995                  |

Burden and Treatment of Achondroplasia SLR – Supplementary Appendices

| Group                                          | #  | Searches                                                                                                 | Results<br>(11.09.20) | Results<br>(10.06.21) |
|------------------------------------------------|----|----------------------------------------------------------------------------------------------------------|-----------------------|-----------------------|
|                                                | 2  | (achondroplas\$ or FGFR3\$ or FGFR-3\$ or Fibroblast Growth Factor Receptor 3).ti,ab,kw.                 | 6388                  | 6782                  |
|                                                | 3  | 1 or 2                                                                                                   | 7319                  | 7723                  |
| <b>RCTs</b>                                    | 4  | "randomized controlled trial (topic)"/                                                                   | 185806                | 204657                |
|                                                | 5  | randomized controlled trial/                                                                             | 619164                | 660463                |
|                                                | 6  | clinical trial/                                                                                          | 982734                | 1004644               |
|                                                | 7  | exp "clinical trial (topic)"/                                                                            | 331586                | 358413                |
|                                                | 8  | controlled clinical trial/                                                                               | 464566                | 463504                |
|                                                | 9  | multicenter study/                                                                                       | 261302                | 289842                |
|                                                | 10 | exp randomization/                                                                                       | 88082                 | 91209                 |
|                                                | 11 | single blind procedure/                                                                                  | 40106                 | 42848                 |
|                                                | 12 | double blind procedure/                                                                                  | 175711                | 184677                |
|                                                | 13 | crossover procedure/                                                                                     | 64301                 | 67159                 |
|                                                | 14 | placebo/                                                                                                 | 354584                | 367187                |
|                                                | 15 | phase 1 clinical trial/ or phase 2 clinical trial/ or phase 3 clinical trial/ or phase 4 clinical trial/ | 163567                | 177381                |
|                                                | 16 | (clinical adj trial\$).ti,ab,kw.                                                                         | 552787                | 593881                |
|                                                | 17 | ((singl\$ or doubl\$ or treb\$ or tripl\$) adj (blind\$3 or mask\$3)).ti,ab,kw.                          | 241816                | 251909                |
|                                                | 18 | placebo\$.ti,ab,kw.                                                                                      | 313159                | 327424                |
|                                                | 19 | (allocat\$ adj2 random\$).ti,ab,kw.                                                                      | 44144                 | 46926                 |
|                                                | 20 | Randomi?ed adj2 trial\$.ti,ab,kw.                                                                        | 444685                | 480799                |
|                                                | 21 | rct.ti,ab,kw.                                                                                            | 40375                 | 44514                 |
|                                                | 22 | or/4-21                                                                                                  | 2410758               | 2545054               |
| <b>Non-RCTs/<br/>observational<br/>studies</b> | 23 | exp epidemiology/                                                                                        | 3476935               | 3721562               |
|                                                | 24 | exp case control study/                                                                                  | 178215                | 191151                |
|                                                | 25 | exp cohort analysis/                                                                                     | 612312                | 715015                |
|                                                | 26 | Case control.ti,ab,kw.                                                                                   | 167969                | 178104                |
|                                                | 27 | (cohort adj (study or studies)).ti,ab,kw.                                                                | 315243                | 353125                |
|                                                | 28 | cohort analy\$.ti,ab,kw.                                                                                 | 13435                 | 14884                 |
|                                                | 29 | (follow up adj (study or studies)).ti,ab,kw.                                                             | 67254                 | 69731                 |
|                                                | 30 | (observational adj (study or studies)).ti,ab,kw.                                                         | 173447                | 193742                |
|                                                | 31 | Longitudinal\$.ti,ab,kw.                                                                                 | 364428                | 392597                |
|                                                | 32 | retrospective\$.ti,ab,kw.                                                                                | 1260054               | 1374677               |
|                                                | 33 | Cross sectional.ti,ab,kw.                                                                                | 475608                | 526652                |
|                                                | 34 | cross-sectional study/                                                                                   | 365032                | 414755                |
|                                                | 35 | exp longitudinal study/                                                                                  | 143824                | 156632                |
|                                                | 36 | exp follow-up/                                                                                           | 1579374               | 1694159               |
|                                                | 37 | exp prospective study/                                                                                   | 624575                | 689678                |
|                                                | 38 | exp retrospective study/                                                                                 | 958644                | 1085903               |
|                                                | 39 | exp observational study/                                                                                 | 206530                | 235440                |
|                                                | 40 | (Prospective adj (study or studies)).ti,ab,kw.                                                           | 266255                | 280587                |
|                                                | 41 | (evaluation adj (study or studies)).ti,ab,kw.                                                            | 8386                  | 8907                  |
|                                                | 42 | (epidemiologic adj (study or studies)).ti,ab,kw.                                                         | 34151                 | 35116                 |
|                                                | 43 | ((single arm or Single arm) adj3 (study or studies or trial\$)).ti,ab,kw.                                | 11814                 | 13406                 |
|                                                | 44 | (Open-label adj (trial\$ or stud\$)).ti,ab,kw.                                                           | 19720                 | 20948                 |
|                                                | 45 | Non-blinded stud\$.ti,ab,kw.                                                                             | 193                   | 196                   |
|                                                | 46 | (chart adj3 review).ti,ab,kw.                                                                            | 83290                 | 90646                 |
|                                                | 47 | or/23-46                                                                                                 | 6552508               | 7034296               |
| <b>Exclusion terms</b>                         | 48 | ("conference abstract" or "conference review").pt.                                                       | 3864200               | 4116930               |
|                                                | 49 | limit 48 to yr="1974-2017" <sup>a</sup>                                                                  | 3030273               | 3802372               |
|                                                | 50 | exp animals/ not exp humans/                                                                             | 4674232               | 4793230               |

Burden and Treatment of Achondroplasia SLR – Supplementary Appendices

| Group           | #  | Searches                  | Results<br>(11.09.20) | Results<br>(10.06.21) |
|-----------------|----|---------------------------|-----------------------|-----------------------|
|                 | 51 | editorial.pt.             | 665035                | 693297                |
|                 | 52 | historical article/       | 1                     | 1                     |
|                 | 53 | or/49-52                  | 8079724               | 8914014               |
| <b>Combined</b> | 54 | 3 and (22 or 47)          | 2027                  | 2219                  |
|                 | 55 | 54 not 53                 | 1438                  | 1344                  |
|                 | 56 | Remove duplicates from 55 | <b>1404</b>           | <b>1326</b>           |

<sup>a</sup> limit 48 to yr="1974-2019" was used in the SLR update. **Database:** Embase 1974 to 2020 September 10 (original SLR) and 2021 June 09 (SLR update).

**Supplementary Table 5. Economic evaluation, HRQoL/utility and cost/resource use search terms for Embase (via Ovid)**

| Group                                 | #                                                  | Searches                                                                                                                                                                                                                       | Results<br>(27.08.20) | Results<br>(10.06.21) |
|---------------------------------------|----------------------------------------------------|--------------------------------------------------------------------------------------------------------------------------------------------------------------------------------------------------------------------------------|-----------------------|-----------------------|
| <b>Achondroplasia</b>                 | 1                                                  | exp achondroplasia/ or exp dwarfism/                                                                                                                                                                                           | 7536                  | 7701                  |
|                                       | 2                                                  | (achondroplas\$ or FGFR3\$ or FGFR-3\$ or Fibroblast Growth Factor Receptor 3 or dwarfism*).ti,ab,kw.                                                                                                                          | 10912                 | 11445                 |
|                                       | 3                                                  | 1 or 2                                                                                                                                                                                                                         | 14065                 | 14638                 |
| <b>Economic Evaluations</b>           | 4                                                  | Cost benefit analysis/ or exp economic evaluation/ or cost effectiveness analysis/ or cost minimization analysis/ or cost benefit/                                                                                             | 307773                | 319723                |
|                                       | 5                                                  | Economics/ or health economics/ or socioeconomics/ or economic aspect/ or pharmacoeconomics/                                                                                                                                   | 498023                | 510407                |
|                                       | 6                                                  | (cost\$ adj (effective\$ or utilit\$ or consequence\$ or benefit\$ or minimi\$)).ti,ab,kw.                                                                                                                                     | 208752                | 222988                |
|                                       | 7                                                  | (economic evaluation\$ or economic analysis or life year\$ gained or ICER or QALY\$ or DALY\$ or quality adjusted or adjusted life year\$ or disability adjusted life or qald\$ or qale\$ or qtime\$).ti,ab,kw.                | 54323                 | 58613                 |
|                                       | 8                                                  | Quality adjusted life year/                                                                                                                                                                                                    | 26911                 | 29060                 |
|                                       | 9                                                  | or/4-8                                                                                                                                                                                                                         | 840936                | 872599                |
| <b>Health-Related Quality of Life</b> | 10                                                 | (health utilit\$ or health state\$1 or illness state\$1 or HSUV or HSUVs or health state\$ value\$ or health state\$ preference\$ or utility assessment\$ or utility measure\$ or preference based or utility based).ti,ab,kw. | 16441                 | 17701                 |
|                                       | 11                                                 | ((index adj3 wellbeing) or (quality adj3 wellbeing) or qwb).ti,ab,kw.                                                                                                                                                          | 1213                  | 1349                  |
|                                       | 12                                                 | (multiattribute\$ or multi attribute\$).ti,ab.                                                                                                                                                                                 | 1132                  | 1221                  |
|                                       | 13                                                 | utility.ab. /freq=2                                                                                                                                                                                                            | 27785                 | 30109                 |
|                                       | 14                                                 | (utilities or disutilit\$).ti,ab,kw.                                                                                                                                                                                           | 12472                 | 13420                 |
|                                       | 15                                                 | (euro qual or euro qual5d or euro qol5d or eq-5d or eq5-d or eq5d or eq 5d or euroqual or euroqol or euro qol or euroqual5d or euroqol5d or eq-sdq or eqsdq).ti,ab,kw.                                                         | 21143                 | 23607                 |
|                                       | 16                                                 | (short form\$ or shortform\$).ti,ab.                                                                                                                                                                                           | 46255                 | 50116                 |
|                                       | 17                                                 | (sf36\$ or sf 36\$ or sf thirtysix or sf thirty six).ti,ab,kw.                                                                                                                                                                 | 38415                 | 40579                 |
|                                       | 18                                                 | (sf6 or sf 6 or sf6d or sf 6d or sf six D or sfsixD or sf six or sfsix or sf8 or sf 8 or sf eight or sfeight).ti,ab,kw.                                                                                                        | 4577                  | 4828                  |
|                                       | 19                                                 | (sf12 or sf 12 or sf twelve or sftwelve).ti,ab,kw.                                                                                                                                                                             | 8305                  | 8949                  |
|                                       | 20                                                 | (sf16 or sf 16 or sf sixteen or sfsixteen).ti,ab,kw.                                                                                                                                                                           | 54                    | 56                    |
| 21                                    | (sf20 or sf 20 or sf twenty or sftwenty).ti,ab,kw. | 345                                                                                                                                                                                                                            | 352                   |                       |

Burden and Treatment of Achondroplasia SLR – Supplementary Appendices

| Group | #                                | Searches                                                                                                                                                                                                                                                                                                                                                                                        | Results (27.08.20) | Results (10.06.21) |
|-------|----------------------------------|-------------------------------------------------------------------------------------------------------------------------------------------------------------------------------------------------------------------------------------------------------------------------------------------------------------------------------------------------------------------------------------------------|--------------------|--------------------|
|       | 22                               | (15D or 15-D or 15 dimension).ti,ab,kw.                                                                                                                                                                                                                                                                                                                                                         | 6692               | 6996               |
|       | 23                               | visual analog\$ scale\$.ti,ab,kw.                                                                                                                                                                                                                                                                                                                                                               | 80089              | 86717              |
|       | 24                               | (standard gamble\$ or sg).ti,ab,kw.                                                                                                                                                                                                                                                                                                                                                             | 16341              | 17558              |
|       | 25                               | (time trade off\$1 or time tradeoff\$1 or tto or timetradeoff\$1).ti,ab,kw.                                                                                                                                                                                                                                                                                                                     | 2827               | 2996               |
|       | 26                               | (health\$1 year\$1 equivalent\$1 or hye or hyes).ti,ab,kw.                                                                                                                                                                                                                                                                                                                                      | 154                | 162                |
|       | 27                               | (hui or hui1 or hui2 or hui3 or rosser).ti,ab,kw.                                                                                                                                                                                                                                                                                                                                               | 2466               | 2658               |
|       | 28                               | *quality of life/ and (quality of life or qol or hrqol).ti,ab,kw.                                                                                                                                                                                                                                                                                                                               | 98367              | 106533             |
|       | 29                               | quality of life/ and ((quality of life or qol) adj3 (improv\$ or chang\$)).ti,ab.                                                                                                                                                                                                                                                                                                               | 76938              | 83099              |
|       | 30                               | quality of life/ and ((quality of life or qol or hrqol) adj (score\$1 or measure\$1)).ti,ab,kw.                                                                                                                                                                                                                                                                                                 | 29915              | 32121              |
|       | 31                               | quality of life/ and health-related quality of life.ti,ab,kw.                                                                                                                                                                                                                                                                                                                                   | 59054              | 64114              |
|       | 32                               | quality of life/ and (health adj3 status).ti,ab,kw.                                                                                                                                                                                                                                                                                                                                             | 16371              | 17574              |
|       | 33                               | ((qol or hrqol or quality of life).ti. or *quality of life/) and ((qol or hrqol\$ or quality of life) adj2 (increas\$ or decrease\$ or improv\$ or declin\$ or reduc\$ or high\$ or low\$ or effect or effects or worse or score or scores or change\$1 or impact\$1 or impacted or deteriorat\$)).ab.                                                                                          | 50970              | 55301              |
|       | 34                               | (brief pain inventory or BPI\$ or patient health questionnaire\$ or PHQ\$ or (generalized anxiety disorder\$ adj2 questionnaire) or GAD\$ or PedsQL or Peds-QL or Pediatric Quality of Life Inventory or Quality of Life of Short Stature Youth or QoLISSY or adolescent pediatric pain tool or adolescent paediatric pain tool or APPT or weefim or functional independence measure).ti,ab,kw. | 96568              | 104115             |
|       | 35                               | or/10-34                                                                                                                                                                                                                                                                                                                                                                                        | 470636             | 507722             |
|       | Healthcare Cost and Resource Use | 36                                                                                                                                                                                                                                                                                                                                                                                              | Cost control/      | 68645              |
| 37    |                                  | Cost of illness/                                                                                                                                                                                                                                                                                                                                                                                | 19285              | 19908              |
| 38    |                                  | Health care cost/                                                                                                                                                                                                                                                                                                                                                                               | 190528             | 198654             |
| 39    |                                  | Drug cost/                                                                                                                                                                                                                                                                                                                                                                                      | 77613              | 79860              |
| 40    |                                  | Hospital cost/                                                                                                                                                                                                                                                                                                                                                                                  | 21600              | 22585              |
| 41    |                                  | exp Budget/                                                                                                                                                                                                                                                                                                                                                                                     | 29294              | 30550              |
| 42    |                                  | Financial management/                                                                                                                                                                                                                                                                                                                                                                           | 113339             | 115171             |
| 43    |                                  | health care financing/                                                                                                                                                                                                                                                                                                                                                                          | 13310              | 13472              |
| 44    |                                  | exp Fee/                                                                                                                                                                                                                                                                                                                                                                                        | 40171              | 40981              |
| 45    |                                  | (low adj cost).mp.                                                                                                                                                                                                                                                                                                                                                                              | 67323              | 74988              |
| 46    |                                  | (high adj cost).mp.                                                                                                                                                                                                                                                                                                                                                                             | 19477              | 21180              |
| 47    |                                  | (health?care adj cost\$.mp.                                                                                                                                                                                                                                                                                                                                                                     | 20758              | 22908              |
| 48    |                                  | (fiscal or funding or financial or finance).ti,ab,kw.                                                                                                                                                                                                                                                                                                                                           | 202567             | 222888             |
| 49    |                                  | (cost adj estimate\$.mp.                                                                                                                                                                                                                                                                                                                                                                        | 3451               | 3685               |
| 50    |                                  | (cost adj variable\$.mp.                                                                                                                                                                                                                                                                                                                                                                        | 266                | 281                |
| 51    |                                  | (unit adj cost\$.mp.                                                                                                                                                                                                                                                                                                                                                                            | 4534               | 4829               |
| 52    |                                  | (economic\$ or pharmacoeconomic\$ or price\$ or pricing).ti,ab,kw.                                                                                                                                                                                                                                                                                                                              | 402434             | 434957             |
| 53    |                                  | ((resource\$ or healthcare\$ or service\$) adj3 (use\$ or utilis\$ or utiliz\$ or consume\$ or consuming or consumption\$)).ti,ab,kw.                                                                                                                                                                                                                                                           | 147742             | 160939             |
| 54    |                                  | ((patient\$ or caregiver\$ or carer\$ or social\$ or society\$ or family\$ or work\$) adj2 (burden\$ or productiv\$)).ti,ab,kw.                                                                                                                                                                                                                                                                 | 33522              | 37338              |
| 55    |                                  | ("length of stay" or utili?ation or "economic burden" or "cost-of-illness" or nursing cost\$ or physician cost\$ or physician visit\$ or "out of pocket").ti,ab,kw.                                                                                                                                                                                                                             | 404402             | 438913             |

## Burden and Treatment of Achondroplasia SLR – Supplementary Appendices

| Group              | #  | Searches                                                                                                                                               | Results (27.08.20) | Results (10.06.21) |
|--------------------|----|--------------------------------------------------------------------------------------------------------------------------------------------------------|--------------------|--------------------|
|                    | 56 | (absenteeism or presenteeism or employment or unemployment).ti,ab,kw. or exp presenteeism/ or exp absenteeism/ or exp unemployment/ or exp employment/ | 147396             | 157144             |
|                    | 57 | or/36-56                                                                                                                                               | 1543616            | 1654805            |
| <b>Exclusion</b>   | 58 | ("conference abstract" or "conference review").pt.                                                                                                     | 3859319            | 4116930            |
|                    | 59 | limit 58 to yr="1974-2017"                                                                                                                             | 3030273            | 3802372            |
|                    | 60 | exp animal/ not exp human/                                                                                                                             | 4669553            | 4793230            |
|                    | 61 | (comment or editorial).pt.                                                                                                                             | 663975             | 693297             |
|                    | 62 | historical period/                                                                                                                                     | 673                | 736                |
|                    | 63 | or/59-62                                                                                                                                               | 8074505            | 8914580            |
| <b>Combination</b> | 64 | 3 and (9 or 35 or 57)                                                                                                                                  | 382                | 414                |
|                    | 65 | 64 not 63                                                                                                                                              | 252                | 241                |
|                    | 66 | remove duplicates from 65                                                                                                                              | <b>251</b>         | <b>241</b>         |

Embase 1974 to 2020 August 27 (original SLR) and 2021 June 09 (SLR update).

### Supplementary Table 6. Search terms for Cochrane Library databases: CDSR and CENTRAL (via Wiley)

| Group                 | # | Searches                                                                                    | Results (11.09.20) | Results (10.06.21) |
|-----------------------|---|---------------------------------------------------------------------------------------------|--------------------|--------------------|
| <b>Achondroplasia</b> | 1 | [mh "achondroplasia"]                                                                       | 8                  | 11                 |
|                       | 2 | (achondroplas* OR FGFR3* OR FGFR NEXT 3* OR "Fibroblast Growth Factor Receptor 3"):ti,ab,kw | 81                 | 100                |
|                       | 3 | #1 OR #2                                                                                    | 81                 | 100                |
| <b>Combined</b>       | 4 | #3 in Trials                                                                                | <b>81</b>          | <b>100</b>         |
|                       | 5 | #3 in Cochrane Reviews and Cochrane Protocols                                               | <b>0</b>           | <b>0</b>           |

### Supplementary Table 7. Search terms for DARE (via the University of York CRD platform)

| Group                 | # | Searches                                                                    | Results (11.09.20) |
|-----------------------|---|-----------------------------------------------------------------------------|--------------------|
| <b>Achondroplasia</b> | 1 | (MeSH DESCRIPTOR achondroplasia EXPLODE ALL TREES)                          | 4                  |
|                       | 2 | (achondroplas* or FGFR3* or FGFR-3* or Fibroblast Growth Factor Receptor 3) | 7                  |
|                       | 3 | (#1 or #2) in DARE                                                          | <b>1</b>           |

### Supplementary Table 8. Search terms for the NHS-EED and HTAD (via the University of York CRD platform)

| Group                 | # | Searches                                                                                           | Results (27.08.20) |
|-----------------------|---|----------------------------------------------------------------------------------------------------|--------------------|
| <b>Achondroplasia</b> | 1 | (MeSH DESCRIPTOR achondroplasia EXPLODE ALL TREES) or (MeSH DESCRIPTOR dwarfism EXPLODE ALL TREES) | 21                 |
|                       | 2 | (achondroplas* or FGFR3* or FGFR-3* or Fibroblast Growth Factor Receptor 3 or dwarfism*)           | 16                 |
|                       | 3 | (#1 or #2) in NHS EED, HTAD                                                                        | <b>17</b>          |

**Supplementary Table 9. Search terms for the HTAD (via the INAHTA platform)**

| Group          | # | Searches                                                                 | Results (10.06.21) |
|----------------|---|--------------------------------------------------------------------------|--------------------|
| Achondroplasia | 1 | "Achondroplasia"[mhe] or "dwarfism"[mhe]                                 | 5                  |
|                | 2 | achondroplas*                                                            | 5                  |
|                | 3 | FGFR3* or "FGFR-3*" or "FGFR 3" or "Fibroblast Growth Factor Receptor 3" | 0                  |
|                | 4 | dwarfism*                                                                | 1                  |
| Combination    | 5 | #1 or #2 or #3 or #4                                                     | 7                  |

Supplementary Database Search Terms**Supplementary Table 10. Search terms for non-English databases and clinical trial registries**

| Database                                                                                         | Group          | # | Searches                                                                     | Results (Original SLR) | Results (SLR update) |
|--------------------------------------------------------------------------------------------------|----------------|---|------------------------------------------------------------------------------|------------------------|----------------------|
| VHL (via <a href="https://bvshalud.org">https://bvshalud.org</a> )                               | Achondroplasia | 1 | tw:(achondroplasia) OR tw:(achondroplasia)<br><i>Filter out MEDLINE hits</i> | 145                    | NA                   |
| LiSSa (via <a href="https://www.lissa.fr/dc/#env=lissa">https://www.lissa.fr/dc/#env=lissa</a> ) | Achondroplasia | 1 | (achondroplasia.tl) OU (achondroplasia.mc)                                   | 136                    | 137                  |
| Ichushi Web                                                                                      | Achondroplasia | 1 | 軟骨無形成症/TH                                                                    | 2044                   | NA                   |
|                                                                                                  |                | 2 | 軟骨無形成症/TA or FGFR3/TA or FGFR-3/TA                                           | 846                    | NA                   |
|                                                                                                  |                | 3 | #1 or #2                                                                     | 2275                   | NA                   |
|                                                                                                  | Exclusion      | 4 | 動物/TH not ヒト/TH                                                              | 341967                 | NA                   |
|                                                                                                  |                | 5 | (#3) and (CK=動物)                                                             | 242                    | NA                   |
|                                                                                                  |                | 6 | #4 or #5                                                                     | 342131                 | NA                   |
|                                                                                                  |                | 7 | #3 not #6                                                                    | 2031                   | NA                   |
|                                                                                                  |                | 8 | (#7) and (LA=日本語)                                                            | 1819                   | NA                   |
|                                                                                                  |                | 9 | #8 and (AB=Y or FT=Y)                                                        | 804                    | NA                   |
| CrescNet (via <a href="https://crescnet.org">https://crescnet.org</a> )                          | Achondroplasia | 1 | <i>Publications listed under "Wissenschaft" tab were searched</i>            | NA                     | 35                   |
| ClinicalTrials.gov                                                                               | Achondroplasia | 1 | Achondroplasia                                                               | 23                     | 25                   |
|                                                                                                  |                | 2 | FGFR3 Gene Mutation                                                          | 11                     | 12                   |
| EU Clinical Trials                                                                               | Achondroplasia | 1 | Achondroplasia                                                               | NA                     | 11                   |
|                                                                                                  |                | 2 | FGFR3 Gene Mutation                                                          | NA                     | 9                    |
| European Medicines Agency (EMA) clinical data portal                                             | Achondroplasia | 1 | Achondroplasia                                                               | NA                     | 0                    |
|                                                                                                  |                | 2 | FGFR3                                                                        | NA                     | 3                    |
| Arzneimittel Informationssystem (AMIS)                                                           | Achondroplasia | 1 | achondroplasia                                                               | NA                     | 0                    |
|                                                                                                  |                | 2 | achondroplasia                                                               | NA                     | 4                    |
|                                                                                                  |                | 3 | FGFR3                                                                        | NA                     | 4                    |

**Abbreviations:** AMIS, Arzneimittel Informationssystem; EMA, European Medicines Agency; EU-CTR, EU Clinical Trials Register; ICTRP, International Clinical Trials Registry Platform (ICTRP).

**Supplementary Table 11. Search strategies for hand-searching of relevant congresses**

| Conference                                                                                                                                                                                                                                                                                                                                                                                                      | Link                                                                                                                                                                                                                                                                                                                                                                                                                                                                                                                                                                                                                                                                      | Search strategy                                                                                                                                                                                                                                                                                                     | Total hits                                                                                                                                                                                                                                                                                           | Relevant hits                                                                                                                                                                                                                                                                                        |
|-----------------------------------------------------------------------------------------------------------------------------------------------------------------------------------------------------------------------------------------------------------------------------------------------------------------------------------------------------------------------------------------------------------------|---------------------------------------------------------------------------------------------------------------------------------------------------------------------------------------------------------------------------------------------------------------------------------------------------------------------------------------------------------------------------------------------------------------------------------------------------------------------------------------------------------------------------------------------------------------------------------------------------------------------------------------------------------------------------|---------------------------------------------------------------------------------------------------------------------------------------------------------------------------------------------------------------------------------------------------------------------------------------------------------------------|------------------------------------------------------------------------------------------------------------------------------------------------------------------------------------------------------------------------------------------------------------------------------------------------------|------------------------------------------------------------------------------------------------------------------------------------------------------------------------------------------------------------------------------------------------------------------------------------------------------|
| <p>The International Society for Pharmacoeconomics and Outcomes Research (ISPOR) Annual International and European Meetings</p> <ul style="list-style-type: none"> <li>• ISPOR International 2021</li> <li>• ISPOR International 2020</li> <li>• ISPOR International 2019</li> <li>• ISPOR International 2018</li> <li>• ISPOR Europe 2020</li> <li>• ISPOR Europe 2019</li> <li>• ISPOR Europe 2018</li> </ul> | <p>2020, 2019 and 2018:<br/> <a href="https://www.ispor.org/heor-resources/presentations-database/search">https://www.ispor.org/heor-resources/presentations-database/search</a></p>                                                                                                                                                                                                                                                                                                                                                                                                                                                                                      | <p>2021, 2020, 2019 and 2018:<br/>                     Under Conference, click on each congress in turn.<br/>                     Enter in the keyword search bar:</p> <ul style="list-style-type: none"> <li>• achondroplas* OR FGFR3* OR FGFR-3* OR "Fibroblast Growth Factor Receptor 3" OR dwarfism*</li> </ul> | <ul style="list-style-type: none"> <li>• ISPOR International 2021: 1</li> <li>• ISPOR International 2020: 0</li> <li>• ISPOR International 2019: 0</li> <li>• ISPOR International 2018: 0</li> <li>• ISPOR Europe 2020: 0</li> <li>• ISPOR Europe 2019: 0</li> <li>• ISPOR Europe 2018: 0</li> </ul> | <ul style="list-style-type: none"> <li>• ISPOR International 2021: 1</li> <li>• ISPOR International 2020: 0</li> <li>• ISPOR International 2019: 0</li> <li>• ISPOR International 2018: 0</li> <li>• ISPOR Europe 2020: 0</li> <li>• ISPOR Europe 2019: 0</li> <li>• ISPOR Europe 2018: 0</li> </ul> |
| <p>Endocrine Society Conference (ENDO)</p> <ul style="list-style-type: none"> <li>• ENDO 2021</li> <li>• ENDO 2020</li> <li>• ENDO 2019</li> </ul>                                                                                                                                                                                                                                                              | <p>2021:<br/> <a href="https://academic.oup.com/jes/issue/5/Supplement_1">https://academic.oup.com/jes/issue/5/Supplement_1</a><br/>                     2020:<br/> <a href="https://academic.oup.com/jes/issue/4/Supplement_1?page=3#1062435-5832293">https://academic.oup.com/jes/issue/4/Supplement_1?page=3#1062435-5832293</a><br/>                     2019:<br/> <a href="https://academic.oup.com/jes/issue/3/Supplement_1#:~:text=ENDO%202019%20Abstracts%20%2D%20101st%20Annual.%2C%202019%20%E2%80%93%20New%20">https://academic.oup.com/jes/issue/3/Supplement_1#:~:text=ENDO%202019%20Abstracts%20%2D%20101st%20Annual.%2C%202019%20%E2%80%93%20New%</a></p> | <p>2021, 2020, 2019: In the search bar in the top right select the dropdown for "This issue" and search the phrase:<br/>                     achondroplas* OR FGFR3* OR FGFR-3* OR "Fibroblast Growth Factor Receptor 3" OR dwarfism*</p>                                                                           | <ul style="list-style-type: none"> <li>• 2021: 5</li> <li>• 2020: 6</li> <li>• 2019: 7</li> </ul>                                                                                                                                                                                                    | <ul style="list-style-type: none"> <li>• 2021: 1</li> <li>• 2020: 1</li> <li>• 2019: 0</li> </ul>                                                                                                                                                                                                    |

Burden and Treatment of Achondroplasia SLR – Supplementary Appendices

| Conference                                                                                                                                      | Link                                                                                                                                                                                                                                                                                                                                                                                                                                                                                                                                                                                                                                                                                                     | Search strategy                                                                                                                                                                                                                                                                                                                                                                                                      | Total hits                                                                                         | Relevant hits                                                                                     |
|-------------------------------------------------------------------------------------------------------------------------------------------------|----------------------------------------------------------------------------------------------------------------------------------------------------------------------------------------------------------------------------------------------------------------------------------------------------------------------------------------------------------------------------------------------------------------------------------------------------------------------------------------------------------------------------------------------------------------------------------------------------------------------------------------------------------------------------------------------------------|----------------------------------------------------------------------------------------------------------------------------------------------------------------------------------------------------------------------------------------------------------------------------------------------------------------------------------------------------------------------------------------------------------------------|----------------------------------------------------------------------------------------------------|---------------------------------------------------------------------------------------------------|
|                                                                                                                                                 | <a href="#">20Orleans%2C%20Louisiana</a>                                                                                                                                                                                                                                                                                                                                                                                                                                                                                                                                                                                                                                                                 |                                                                                                                                                                                                                                                                                                                                                                                                                      |                                                                                                    |                                                                                                   |
| European Society for Paediatric Endocrinology (ESPE) <ul style="list-style-type: none"> <li>• ESPE 2019</li> <li>• ESPE 2018</li> </ul>         | 2019/2018:<br><a href="https://abstracts.eurospe.org/search">https://abstracts.eurospe.org/search</a>                                                                                                                                                                                                                                                                                                                                                                                                                                                                                                                                                                                                    | In the keyword textbox enter:<br>achondroplas* OR FGFR3* OR FGFR-3* OR "Fibroblast Growth Factor Receptor 3" OR dwarfism*<br>Event series: ESPE Annual Meeting<br>Volume or conference: ESPE2019/ESPE 2018 in turn<br>Click apply.<br>Sift the records giving >20% match                                                                                                                                             | <ul style="list-style-type: none"> <li>• 2019: 38</li> <li>• 2018: 2</li> </ul>                    | <ul style="list-style-type: none"> <li>• 2019: 0</li> <li>• 2018: 0</li> </ul>                    |
| International Conference on Children's Bone Health (ICCBH) <ul style="list-style-type: none"> <li>• ICCBH 2019</li> </ul>                       | 2019: Abstract book, saved to server                                                                                                                                                                                                                                                                                                                                                                                                                                                                                                                                                                                                                                                                     | Use the ctrl+f function to identify each term in turn:<br>1. achondroplasia<br>2. FGFR<br>3. Fibroblast Growth Factor Receptor<br>4. dwarfism<br>Highlight each term once in each abstract it is present in; use a new highlighting colour for each search term; only review abstracts containing the search term; use the comment function to identify hit number of each search term (number of highlighted words) | <ul style="list-style-type: none"> <li>• 2019: 28</li> </ul>                                       | <ul style="list-style-type: none"> <li>• 2019: 0</li> </ul>                                       |
| Annual Clinical Genetics Meeting (ACGM) <ul style="list-style-type: none"> <li>• ACGM 2021</li> <li>• ACGM 2020</li> <li>• ACGM 2019</li> </ul> | 2021:<br><a href="https://acmg.plaion.com/Web/User/AbsSearch?ACCOUNT=ACMG&amp;CONF=AM21&amp;ssoOverride=OFF&amp;USERPID=PUBLIC&amp;standalone=YES">https://acmg.plaion.com/Web/User/AbsSearch?ACCOUNT=ACMG&amp;CONF=AM21&amp;ssoOverride=OFF&amp;USERPID=PUBLIC&amp;standalone=YES</a><br><br>2020:<br><a href="https://www.acmgmeeting.net/acmg2020/Public/Content.aspx?ID=3366&amp;sortMenu=110000">https://www.acmgmeeting.net/acmg2020/Public/Content.aspx?ID=3366&amp;sortMenu=110000</a><br><br>2019:<br><a href="https://acmg.expoplanner.com/index.cfm?do=expomap.sesResults&amp;search_type=abstract">https://acmg.expoplanner.com/index.cfm?do=expomap.sesResults&amp;search_type=abstract</a> | 2021, 2020:<br>In the keyword box, enter the following in turn:<br>1. achondroplasia<br>2. FGFR<br>3. Fibroblast Growth Factor Receptor<br>4. dwarfism<br><br>2020:<br>Under abstract type, select "Poster presentations only". In the keyword box, enter the following in turn:<br>1. achondroplasia<br>2. FGFR3<br>3. Fibroblast Growth Factor Receptor<br>4. dwarfism                                             | <ul style="list-style-type: none"> <li>• 2021: 9</li> <li>• 2020: 3</li> <li>• 2019: 20</li> </ul> | <ul style="list-style-type: none"> <li>• 2021: 1</li> <li>• 2020: 0</li> <li>• 2019: 0</li> </ul> |



| Conference | Link                                          | Search strategy | Total hits | Relevant hits |
|------------|-----------------------------------------------|-----------------|------------|---------------|
|            | <a href="#">s&amp;event_id=13&amp;ID=3331</a> |                 |            |               |

**Abbreviations:** ACGM, Annual Clinical Genetics Meeting; ENDO, Endocrine Society Conference; ESPE, European Society for Paediatric Endocrinology; FGFR3, Fibroblast growth factor receptor 3; ICCBH, International Conference on Children's Bone Health; ISPOR, International Society for Pharmacoeconomics and Outcomes Research.

**Supplementary Table 12. Search strategies for hand-searching of HTA body and economic websites**

| HTA Body                                                 | Link                                                                                                                                                 | Search strategy                                                                                                                                                                                                                                                                                                                                                                                                                                                                                                                                                                                                                                                           | Total hits<br>Original SLR<br>(SLR Update)                                                                                    | Relevant hits<br>Original SLR<br>(SLR Update)                                                                                |
|----------------------------------------------------------|------------------------------------------------------------------------------------------------------------------------------------------------------|---------------------------------------------------------------------------------------------------------------------------------------------------------------------------------------------------------------------------------------------------------------------------------------------------------------------------------------------------------------------------------------------------------------------------------------------------------------------------------------------------------------------------------------------------------------------------------------------------------------------------------------------------------------------------|-------------------------------------------------------------------------------------------------------------------------------|------------------------------------------------------------------------------------------------------------------------------|
| National Centre for Pharmacoeconomics (NCPE)             | <a href="http://www.ncpe.ie/">http://www.ncpe.ie/</a>                                                                                                | In the search bar at the top right, search the following:<br>1. achondroplasia<br>2. dwarfism<br>3. short stature<br>4. FGFR3<br>5. fibroblast growth factor receptor<br>Screen the interventions against the list of relevant interventions in the eligibility table. For each relevant intervention, select these and review the "Summary" document (where available) for relevance. If no summary document is available, use the information given on the screen (these will therefore always be excluded).                                                                                                                                                            | achondroplasia : 0 (0)<br>dwarfism: 0 (0)<br>short stature: 0 (0)<br>FGFR3: 0 (0)<br>fibroblast growth factor receptor: 0 (0) | achondroplasia: 0 (0)<br>dwarfism: 0 (0)<br>short stature: 0 (0)<br>FGFR3: 0 (0)<br>fibroblast growth factor receptor: 0 (0) |
| National Institute for Health and Care Excellence (NICE) | <a href="https://www.nice.org.uk/">https://www.nice.org.uk/</a>                                                                                      | In the search bar, search the following:<br>1. "achondroplasia" OR "dwarfism" OR "short stature" OR "FGFR3" OR "fibroblast growth factor receptor"<br>Under the "Filter results by..." on the left-hand side of the screen, check the following 2 boxes only: "Guidance" and "NICE Advice".<br><br>Screen the titles of the results for relevance. For relevant results, click these and look for the "History" tab on the right-hand side of the screen. Download the "Final Appraisal Document" and "Committee papers" for each result. Within the "Committee papers" document, double click the "Submission from manufacturer" document and screen this for relevance. | achondroplasia : 2 (3)<br>dwarfism: 0 (0)<br>short stature: 2 (0)<br>FGFR3: 2 (0)<br>fibroblast growth factor receptor: 0 (0) | achondroplasia: 0 (0)<br>dwarfism: 0 (0)<br>short stature: 0 (0)<br>FGFR3: 0 (0)<br>fibroblast growth factor receptor: 0 (0) |
| Haute Autorité de Santé (HAS)                            | <a href="http://www.has-sante.fr/portail/jcms/fc_1250_026/fr/evaluation-medico-">www.has-sante.fr/portail/jcms/fc_1250_026/fr/evaluation-medico-</a> | In the search bar in the centre of the homepage, search the following:<br>1. achondroplasie<br>2. nanisme<br>3. "petite taille"<br>4. FGFR3                                                                                                                                                                                                                                                                                                                                                                                                                                                                                                                               | 'Les recommandations et guides' filter:<br>achondroplasia : 0 (0)<br>Nanisme: 4 (4)                                           | 'Les recommandations et guides' filter:<br>achondroplasia: 0 (0)<br>Nanisme: 0 (0)                                           |

## Burden and Treatment of Achondroplasia SLR – Supplementary Appendices

| HTA Body                                                          | Link                                                                                                                                                                                                                                                                                                      | Search strategy                                                                                                                                                                                                                                                                                                                                                                                                                                                                                                                                                                        | Total hits<br>Original SLR<br>(SLR Update)                                                                                                                                                                                                                                                                                        | Relevant hits<br>Original SLR (SLR Update)                                                                                                                                                                                                                                                                                  |
|-------------------------------------------------------------------|-----------------------------------------------------------------------------------------------------------------------------------------------------------------------------------------------------------------------------------------------------------------------------------------------------------|----------------------------------------------------------------------------------------------------------------------------------------------------------------------------------------------------------------------------------------------------------------------------------------------------------------------------------------------------------------------------------------------------------------------------------------------------------------------------------------------------------------------------------------------------------------------------------------|-----------------------------------------------------------------------------------------------------------------------------------------------------------------------------------------------------------------------------------------------------------------------------------------------------------------------------------|-----------------------------------------------------------------------------------------------------------------------------------------------------------------------------------------------------------------------------------------------------------------------------------------------------------------------------|
|                                                                   | <a href="#">economie</a>                                                                                                                                                                                                                                                                                  | <p>5. "récepteur du facteur de croissance des fibroblastes"</p> <p>Select 'Les recommandations et guides' from dropdown menu to the right of the search bar.</p> <p>Repeat this method, this time selecting 'Médicaments' from the dropdown menu.</p>                                                                                                                                                                                                                                                                                                                                  | <p>"petite taille": 197 (213)</p> <p>FGFR3: 0 (1)</p> <p>"récepteur du facteur de croissance des fibroblastes": 0 (0)</p> <p>'Médicaments' filter:</p> <p>achondroplasia: 0 (0)</p> <p>nanisme: 9 (9)</p> <p>"petite taille": 59 (74)</p> <p>FGFR3: 0 (0)</p> <p>"récepteur du facteur de croissance des fibroblastes": 3 (0)</p> | <p>"petite taille": 0 (0)</p> <p>FGFR3: 0 (0)</p> <p>"récepteur du facteur de croissance des fibroblastes": 0 (0)</p> <p>'Médicaments' filter:</p> <p>achondroplasia: 0 (0)</p> <p>nanisme: 0 (0)</p> <p>"petite taille": 0 (0)</p> <p>FGFR3: 0 (0)</p> <p>"récepteur du facteur de croissance des fibroblastes": 0 (0)</p> |
| Ministerio de Sanidad, Consumo y Bienestar Social (MSCBS)         | <a href="https://redets.sanidad.gob.es/productos/buscarProductos.do?metodo=buscaTipos&amp;d-6893580-s=3&amp;d-6893580-p=1&amp;tipo=1&amp;d-6893580-o=1">https://redets.sanidad.gob.es/productos/buscarProductos.do?metodo=buscaTipos&amp;d-6893580-s=3&amp;d-6893580-p=1&amp;tipo=1&amp;d-6893580-o=1</a> | <p>In the Excel file of all records from the website (S:\Clients\BioMarin\BMN-EVDUK-ACP-01a (HTA SLRs for Achondroplasia)\3. Economic SLR\3. Searches\Hand Searches\BioMarin Vosortide Supplementary Searches_MSCBS.xls), Ctrl+F to search for the following:</p> <ol style="list-style-type: none"> <li>1. acondroplasia</li> <li>2. enanismo</li> <li>3. estatura baja</li> <li>4. FGFR3</li> <li>5. "receptor del factor de crecimiento de fibroblastos"</li> </ol> <ul style="list-style-type: none"> <li>• From the website, download the PDF of any relevant records.</li> </ul> | <p>acondroplasia: 0</p> <p>Enanismo: 0</p> <p>estatura baja: 0</p> <p>FGFR3: 0</p> <p>"receptor del factor de crecimiento de fibroblastos": 0</p>                                                                                                                                                                                 | <p>acondroplasia: 0</p> <p>Enanismo: 0</p> <p>estatura baja: 0</p> <p>FGFR3: 0</p> <p>"receptor del factor de crecimiento de fibroblastos": 0</p>                                                                                                                                                                           |
| Comissão Nacional de Incorporação de Tecnologias no SUS (CONITEC) | <a href="http://conitec.gov.br/">http://conitec.gov.br/</a>                                                                                                                                                                                                                                               | <p>In the search bar at the top right, search the following:</p> <ol style="list-style-type: none"> <li>1. acondroplasia</li> <li>2. nanismo</li> <li>3. "baixa estatura"</li> <li>4. FGFR3</li> <li>5. "receptor de fator de crescimento de fibroblasto"</li> </ol>                                                                                                                                                                                                                                                                                                                   | <p>acondroplasia: 0</p> <p>nanismo: 0</p> <p>"baixa estatura": 5</p> <p>FGFR3: 0</p> <p>"receptor de fator de crescimento de fibroblasto": 0</p>                                                                                                                                                                                  | <p>acondroplasia: 0</p> <p>nanismo: 0</p> <p>"baixa estatura": 0</p> <p>FGFR3: 0</p> <p>"receptor de fator de crescimento de fibroblasto": 0</p>                                                                                                                                                                            |

## Burden and Treatment of Achondroplasia SLR – Supplementary Appendices

| HTA Body                                                    | Link                                                                | Search strategy                                                                                                                                                                         | Total hits<br>Original SLR<br>(SLR Update)                                                                                            | Relevant hits<br>Original SLR (SLR Update)                                                                                           |
|-------------------------------------------------------------|---------------------------------------------------------------------|-----------------------------------------------------------------------------------------------------------------------------------------------------------------------------------------|---------------------------------------------------------------------------------------------------------------------------------------|--------------------------------------------------------------------------------------------------------------------------------------|
|                                                             |                                                                     |                                                                                                                                                                                         |                                                                                                                                       | de fibroblasto":<br>0                                                                                                                |
| Instituto de Evaluación Tecnológica en Salud (IETS)         | <a href="http://www.iets.org.co/">http://www.iets.org.co/</a>       | In the search bar at the top right, search the following:<br>1. acondroplasia<br>2. enanismo<br>3. estatura baja<br>4. FGFR3<br>5. "receptor del factor de crecimiento de fibroblastos" | acondroplasia: 0<br>enanismo: 0<br>estatura baja: 0<br>FGFR3: 0<br>"receptor del factor de crecimiento de fibroblastos": 0            | acondroplasia: 0<br>enanismo: 0<br>estatura baja: 0<br>FGFR3: 0<br>"receptor del factor de crecimiento de fibroblastos": 0           |
| Agenzia Nazionale per i Servizi Sanitari Regionali (AGENAS) | <a href="https://www.agenas.gov.it/">https://www.agenas.gov.it/</a> | In the search bar at the top right, search the following:<br>1. acondroplasia<br>2. nanismo<br>3. "bassa statura"<br>4. FGFR3<br>5. "recettore del fattore di crescita dei fibroblasti" | acondroplasia: (0)<br>nanismo: (0)<br>"bassa statura": (0)<br>FGFR3: (0)<br>"recettore del fattore di crescita dei fibroblasti": (0)  | acondroplasia: (0)<br>nanismo: (0)<br>"bassa statura": (0)<br>FGFR3: (0)<br>"recettore del fattore di crescita dei fibroblasti": (0) |
| Agenize Italiana del Farmaco (AIFA)                         | <a href="https://www.aifa.gov.it/">https://www.aifa.gov.it/</a>     | In the search bar at the top right, search the following:<br>1. acondroplasia<br>2. nanismo<br>3. "bassa statura"<br>4. FGFR3<br>5. "recettore del fattore di crescita dei fibroblasti" | acondroplasia: (5)<br>nanismo: (0)<br>"bassa statura": (14)<br>FGFR3: (0)<br>"recettore del fattore di crescita dei fibroblasti": (0) | acondroplasia: (0)<br>nanismo: (0)<br>"bassa statura": (0)<br>FGFR3: (0)<br>"recettore del fattore di crescita dei fibroblasti": (0) |
| Institute for Quality and Efficiency in Health Care (IQWiG) | <a href="https://www.iqwig.de/">https://www.iqwig.de/</a>           | In the search bar, search the following:<br>1. achondroplasie<br>2. zwergwuchs<br>3. kleinwuchs<br>4. FGFR3<br>5. "Fibroblasten-Wachstumsfaktor-Rezeptor"                               | achondroplasie : (0)<br>zwergwuchs: (0)<br>kleinwuchs: (2)<br>FGFR3: (0)<br>"Fibroblasten-Wachstumsfaktor-Rezeptor": (0)              | achondroplasie: (0)<br>zwergwuchs: (0)<br>kleinwuchs: (0)<br>FGFR3: (0)<br>"Fibroblasten-Wachstumsfaktor-Rezeptor": (0)              |
| Gemeinsamer                                                 | <a href="https://www.g-ba.de/">https://www.g-ba.de/</a>             | In the search bar at the top right, search the following:<br>1. achondroplasie                                                                                                          | achondroplasie : (1)                                                                                                                  | achondroplasie: (1)                                                                                                                  |

Burden and Treatment of Achondroplasia SLR – Supplementary Appendices

| HTA Body                                                                        | Link                                                                                                                                                                                | Search strategy                                                                                                                                                                                                                                                                                                                                                                                                                                                                                                                                                                                                                                                                                                                                                                                                                                     | Total hits<br>Original SLR<br>(SLR Update)                                                                    | Relevant hits<br>Original SLR<br>(SLR Update)                                                              |
|---------------------------------------------------------------------------------|-------------------------------------------------------------------------------------------------------------------------------------------------------------------------------------|-----------------------------------------------------------------------------------------------------------------------------------------------------------------------------------------------------------------------------------------------------------------------------------------------------------------------------------------------------------------------------------------------------------------------------------------------------------------------------------------------------------------------------------------------------------------------------------------------------------------------------------------------------------------------------------------------------------------------------------------------------------------------------------------------------------------------------------------------------|---------------------------------------------------------------------------------------------------------------|------------------------------------------------------------------------------------------------------------|
| Bundesausschuss (G-BA)                                                          |                                                                                                                                                                                     | <p>2. zwergwuchs<br/>3. kleinwuchs<br/>4. FGFR3<br/>5. "Fibroblasten-Wachstumsfaktor-Rezeptor"<br/>Filtered by<br/>"Nutzenbewertungsverfahren"<br/>("benefit assessment procedures")</p>                                                                                                                                                                                                                                                                                                                                                                                                                                                                                                                                                                                                                                                            | <p>zwergwuchs: (2)<br/>kleinwuchs: (28)<br/>FGFR3: (16)<br/>"Fibroblasten-Wachstumsfaktor-Rezeptor": (33)</p> | <p>zwergwuchs: (1)<br/>kleinwuchs: (3)<br/>FGFR3: (0)<br/>"Fibroblasten-Wachstumsfaktor-Rezeptor": (1)</p> |
| The Cost-Effectiveness Analysis (CEA) Registry, managed by Tufts Medical Center | <a href="http://healthconometrics.tuftsmedicalcenter.org/cear4/SearchingtheCEARegistry.aspx">http://healthconometrics.tuftsmedicalcenter.org/cear4/SearchingtheCEARegistry.aspx</a> | <p>Click on the yellow box titled 'View the CEA Registry'. In the search bar, paste in the first search term in the list below, with 'Methods' selected and hit search.<br/>1. achondroplasia<br/>2. dwarfism<br/>3. "short stature"<br/>4. FGFR3<br/>5. "fibroblast growth factor receptor"<br/>Cross reference all results against the title/abstract review tracker. For any articles that were not captured in the title/abstract review, screen the abstract against the title/abstract eligibility flowchart. For any relevant at this stage, search for and download any freely available full text articles (using the full text searching process document in the Evidence Development Manual). Record any full texts behind paywalls. Repeat the above for each term with 'Ratios' selected and then with 'Utility Weights' selected.</p> | 0 (0)                                                                                                         | 0 (0)                                                                                                      |
| The University of Sheffield Health Utilities Database (SchARRHU D)              | <a href="http://www.scharrhudd.org/">http://www.scharrhudd.org/</a>                                                                                                                 | <p>Select "search" in the menu at the top. In the first search bar, search for the following (in Abstract [AB]):<br/>1. achondroplasia<br/>2. dwarfism<br/>3. "short stature"<br/>4. FGFR3<br/>5. "fibroblast growth factor receptor"<br/>Cross reference all results against the title/abstract review tracker. For any articles that were not captured in the title/abstract review, screen the abstract against the title/abstract eligibility flowchart. For any relevant at this stage, search for and download any freely available full-text articles. Record any full texts behind paywalls.</p>                                                                                                                                                                                                                                            | 0 (0)                                                                                                         | 0 (0)                                                                                                      |

| HTA Body                        | Link                                                                                                                  | Search strategy                                                                                                                                                                                                                                                                                                                                                                                                                                                                                                                                                                                                                                                                                                                                                                                                                                                                                                                                                                                                                                                                                                                                                                                                                                                                                                                                                                                                                                                                    | Total hits<br>Original SLR<br>(SLR Update) | Relevant hits<br>Original SLR (SLR Update) |
|---------------------------------|-----------------------------------------------------------------------------------------------------------------------|------------------------------------------------------------------------------------------------------------------------------------------------------------------------------------------------------------------------------------------------------------------------------------------------------------------------------------------------------------------------------------------------------------------------------------------------------------------------------------------------------------------------------------------------------------------------------------------------------------------------------------------------------------------------------------------------------------------------------------------------------------------------------------------------------------------------------------------------------------------------------------------------------------------------------------------------------------------------------------------------------------------------------------------------------------------------------------------------------------------------------------------------------------------------------------------------------------------------------------------------------------------------------------------------------------------------------------------------------------------------------------------------------------------------------------------------------------------------------------|--------------------------------------------|--------------------------------------------|
| The EQ-5D Publications Database | <a href="http://eq-5dpublications.euroqol.org/?noheader=true">http://eq-5dpublications.euroqol.org/?noheader=true</a> | <p>Ensure the advanced search is presented. In the “type” dropdown, select “abstract” and in the “abstract” box enter the following:</p> <ol style="list-style-type: none"> <li>1. "achondroplasia" OR "dwarfism" OR "short stature" OR "FGFR3" OR "fibroblast growth factor receptor"</li> </ol> <p>Click the [+] button to the right of the abstract. This will add a new search line. In this search line in the “type” dropdown, select “And” in the operator box and “abstract” in the Type box. Search the following in the “abstract” box:</p> <ol style="list-style-type: none"> <li>2. Cost</li> </ol> <p>Cross reference all results against the title/abstract review tracker. For any articles that were not captured in the title/abstract review, screen the abstract against the title/abstract eligibility flowchart. For any relevant at this stage, search for and download any freely available full-text articles (using the full-text searching process document in the Evidence Development Manual). Record any full texts behind paywalls.</p> <p>Once the results of "achondroplasia" OR "dwarfism" OR "short stature" OR "FGFR3" OR "fibroblast growth factor receptor" AND cost have been searched, delete “cost” from the abstract box and replace it with the following terms one by one:</p> <ol style="list-style-type: none"> <li>3. Economic</li> <li>4. Utility</li> <li>5. Utilities</li> <li>6. Quality of life</li> <li>7. Resource</li> </ol> | 3 (0)                                      | 0 (0)                                      |

**Abbreviations:** AB, abstract; AGENAS, Agenzia Nazionale per i Servizi Sanitari Regionali; AIFA, Agenzia Italiana del Farmaco; CEA, Cost-effectiveness analysis; CONETIC, Comissão Nacional de Incorporação de Tecnologias no SUS; FGFR3, fibroblast growth factor receptor 3 gene; EQ-5D, EuroQol-5 Dimension Questionnaire; G-BA, Gemeinsamer Bundesausschuss; HAS, Haute Autorité de Santé; HTA, Health Technology Assessment; IETS, Instituto de Evaluación Tecnológica en Salud; IQWiG, Institute for Quality and Efficiency in Health Care; MSCBS, Ministerio de Sanidad, Consumo y Bienestar Social; NCPE, National Centre for Pharmacoeconomics; NICE, National Institute for Health and Care Excellence; SchARRHUD, School of Health and Related Research Health Utilities Database.

## Guidelines

**Supplementary Table 13. Search terms for clinical guideline repositories**

| Source                                                                     | Link                                                                          | Search Strategy (18.06.21)                                                                                                                 |
|----------------------------------------------------------------------------|-------------------------------------------------------------------------------|--------------------------------------------------------------------------------------------------------------------------------------------|
| The Guidelines International Network (GIN) International Guideline Library | <a href="https://guidelines.euroqol.com/">https://guidelines.euroqol.com/</a> | <p>Use the search bar to search for each key word in turn:</p> <ol style="list-style-type: none"> <li>1. achondroplasia: 0 hits</li> </ol> |

## Burden and Treatment of Achondroplasia SLR – Supplementary Appendices

| Source                                                    | Link                                                                                                                                | Search Strategy (18.06.21)                                                                                                                                                                                                                                                                                 |
|-----------------------------------------------------------|-------------------------------------------------------------------------------------------------------------------------------------|------------------------------------------------------------------------------------------------------------------------------------------------------------------------------------------------------------------------------------------------------------------------------------------------------------|
|                                                           |                                                                                                                                     | 2. FGFR: 0 hits<br>3. Fibroblast Growth Factor Receptor: 0 hits<br>4. dwarfism: 0 hits                                                                                                                                                                                                                     |
| Evidence Search, maintained by the UK NHS                 | <a href="https://www.evidence.nhs.uk/">https://www.evidence.nhs.uk/</a>                                                             | Search each key word in turn, filtering the 'Evidence type' to 'Guidance'.<br><br>1. achondroplasia: 8 hits<br>2. FGFR: 3 hits<br>3. Fibroblast Growth Factor Receptor: 47 hits<br>4. dwarfism: 4 hits                                                                                                     |
| GuidelineCentral.com app                                  | <a href="https://www.guidelinecentral.com/summaries/">https://www.guidelinecentral.com/summaries/</a>                               | Navigate to the search tab and then search each key word in turn, filtering to 'title'.<br><br>1. achondroplasia: 0 hits<br>2. FGFR: 0 hits<br>3. Fibroblast Growth Factor Receptor: 0 hits<br>4. dwarfism: 0 hits                                                                                         |
| Das Portal der Wissenschaftlichen Medizin (AWMF)          | <a href="https://www.awmf.org/leitlinieNAktuelle-leitlinien.html#FA">https://www.awmf.org/leitlinieNAktuelle-leitlinien.html#FA</a> | Search for each key word in turn:<br><br>1. achondroplasie: 6 hits<br>2. FGFR: 9 hits<br>3. Fibroblasten-Wachstumsfaktor-Rezeptor: 0 hits<br>4. zwergrwuchs: 0 hits                                                                                                                                        |
| The National Agency for Regional Health Services (AGENAS) | <a href="https://www.agenas.gov.it/">https://www.agenas.gov.it/</a>                                                                 | Search for each key word in turn:<br><br>1. acondroplasia: 0 hits<br>2. FGFR: 0 hits<br>3. Recettore del fattore di crescita dei fibroblasti: 0 hits<br>4. nanismo: 0 hits                                                                                                                                 |
| Haute Autorité de Santé (HAS)                             | <a href="https://www.has-sante.fr/">https://www.has-sante.fr/</a>                                                                   | Search for each key word in turn filtering for 'les recommandations et guides'. Record results for 'practice guidelines and other guides'.<br><br>1. achondroplasie: 0 hits<br>2. FGFR: 0 hits<br>3. Récepteur du facteur de croissance des fibroblastes: 1 hit<br>4. nanisme: 1 hit                       |
| PubMed                                                    | <a href="https://pubmed.ncbi.nlm.nih.gov/">https://pubmed.ncbi.nlm.nih.gov/</a>                                                     | ("guideline"[Publication Type] OR "clinical guideline"[Publication Type] OR "practice guideline"[Publication Type]) AND (achondroplasia OR "short stature" OR dwarfism): 40 hits                                                                                                                           |
| Google                                                    | <a href="https://www.google.co.uk/">https://www.google.co.uk/</a>                                                                   | Review the first 50 results using the following search strings:<br><ul style="list-style-type: none"> <li>• ("guideline" AND "achondroplasia")</li> <li>• ("guideline" AND "short stature" OR "dwarfism")</li> </ul><br>("best practice*" OR "guideline*") AND ("achondroplasia" OR "skeletal dysplasias") |

**Abbreviations:** AGENAS, Agenzia Nazionale per i Servizi Sanitari Regionali; AWMF, Arbeitsgemeinschaft der Wissenschaftlichen Medizinischen Fachgesellschaften; GIN, Guidelines International Network; HAS, Haute Autorité de Santé.
